# Supplementary material for: Novel methicillin resistance gene mecD in clinical Macrococcus caseolyticus strains from bovine and canine sources
Source: PubMed Central journal article supplement (PMC5341023; doi:10.1038/srep43797), 2017-03-08
Supplement: srep43797-s1.pdf [file srep43797-s1.pdf]

**Novel methicillin resistance gene *mecD* in clinical *Micrococcus caseolyticus* strains from bovine and canine sources**

Sybille Schwendener, Kerstin Cotting, Vincent Perreten\*

Institute of Veterinary Bacteriology, Vetsuisse Faculty, University of Bern, Bern, Switzerland

\*Corresponding author. Mailing address: Institute of Veterinary Bacteriology, University of Bern, Länggassstrasse 122, CH-3012 Bern, Switzerland, Phone: +41 31 631 24 30. Fax: +41 31 631 26 34. E-mail: [vincent.perreten@vetsuisse.unibe.ch](mailto:vincent.perreten@vetsuisse.unibe.ch).

## Supplementary Figures

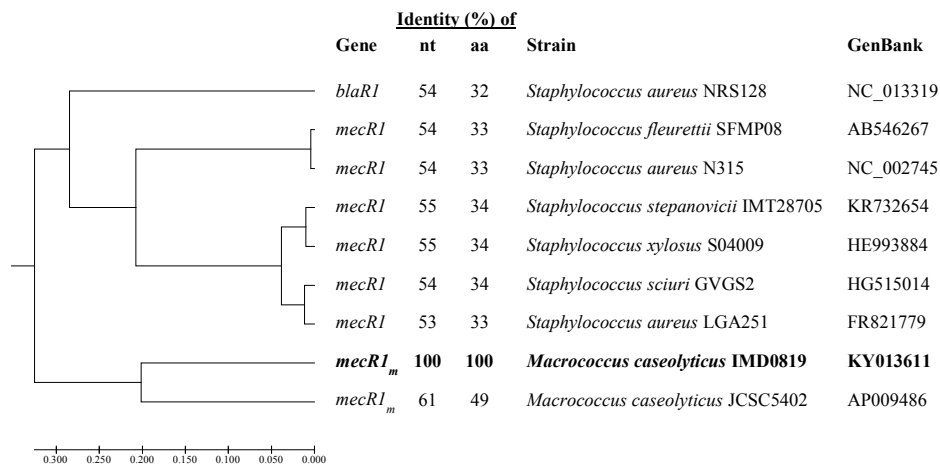

Supplementary Figure S1. Phylogenetic tree of the receptors *mecR1/blaR1* of homologous systems consisting of *mec-mecR1-mecI* or *blaZ-blaR1-blaI* operon. Evolutionary analysis was performed for nucleotide sequences using the UPGMA method in MEGA7 [Mol. Biol. Evol. 2016; 33(7):1870-4.]. The percentage of nucleotide (nt) and amino acid (aa) identity between *mecR1<sub>m</sub>* of *M. caseolyticus* strain IMD0819 and other *mecR1/blaR1* receptors was determined by sequence alignment with Clustral OMEGA [<http://www.ebi.ac.uk/Tools/msa/clustalo/>]. Note: the *mecR1* sequence of *S. saprophyticus* strain 210 is only partially available in the GenBank and was therefore omitted. The *mecA1* gene of *S. sciuri* and the *mecA2* gene of *S. vitulinus* are not preceded by regulator genes.

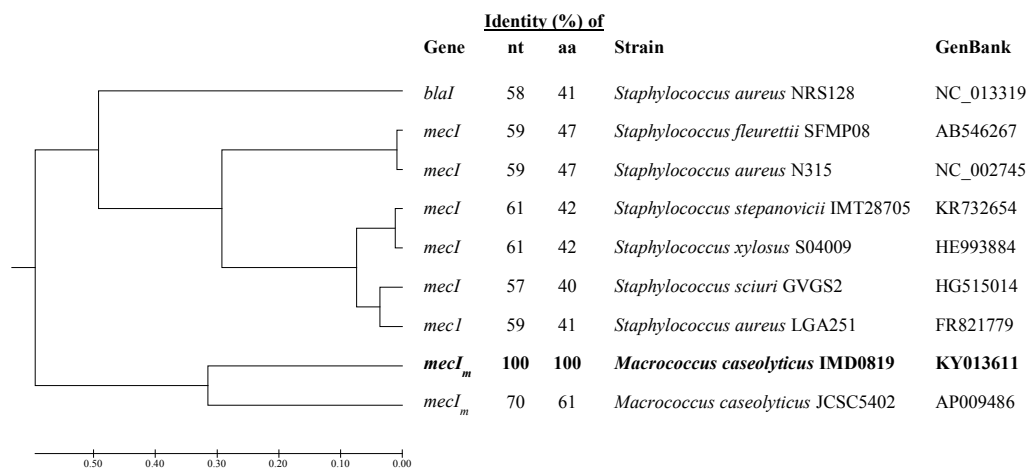

Supplementary Figure S2. Phylogenetic tree of the transcriptional repressors *mecl/blaI* of homologous systems consisting of *mec-mecRI-mecI* or *blaZ-blaRI-blaI* operon. Evolutionary analysis was performed for nucleotide sequences using the UPGMA method in MEGA7 [Mol. Biol. Evol. 2016; 33(7):1870-4.]. The percentage of nucleotide (nt) and amino acid (aa) identity between *mecl<sub>m</sub>* of *M. caseolyticus* strain IMD0819 and other *mecl/blaI* repressors was determined by sequence alignment with Clustral OMEGA [http://www.ebi.ac.uk/Tools/msa/clustalo/]. Note: *mecl* sequence of *S. saprophyticus* strain 210 is not available in the GenBank, and the *mecAI* gene of *S. sciuri* and the *mecA2* gene of *S. vitulinus* are not preceded by regulator genes.

## Supplementary Tables

Supplementary Table S1. Oligonucleotide primers.

| Primer name | Primer label in Figure 3 | Sequence (5'-3')                                 | Target                                      | Reference                                          |
|-------------|--------------------------|--------------------------------------------------|---------------------------------------------|----------------------------------------------------|
| mecA-1      | -                        | AAAATCGATGGTAAAGGTTGGC                           | <i>mecA</i>                                 | J. Clin. Microbiol. 2002; 40(8):2786-90.           |
| mecA-2      | -                        | AGTTCTGCAGTACCGGATTTGC                           | <i>mecA</i>                                 | J. Clin. Microbiol. 2002; 40(8):2786-90.           |
| mecB-fw     | -                        | TGTTCCGGCATTTCGACGAA                             | <i>mecB</i>                                 | Antimicrob. Agents Chemother. 2015; 59(8):4577-83. |
| mecB-rv     | -                        | TCTCCCTGGCCATATCCTGA                             | <i>mecB</i>                                 | Antimicrob. Agents Chemother. 2015; 59(8):4577-83. |
| mecC-F      | -                        | CAGCCAGATTCATTGTACC                              | <i>mecC</i>                                 | J. Dairy Sci. 2013; 96(4):2247-57.                 |
| mecC-R      | -                        | AACATCGTACGATGGGGTAC                             | <i>mecC</i>                                 | J. Dairy Sci. 2013; 96(4):2247-57.                 |
| mecD-F      | a                        | TCCTTTAGCGATAGATGGTGAA                           | <i>mecD</i>                                 | This study                                         |
| mecD-R      | b                        | CTCCCATCTTTTCTCCATCCT                            | <i>mecD</i>                                 | This study                                         |
| mecD-XhoI-F | -                        | TTATA <u>CTCGAG</u> ATTACACCTCCAATTCTATTATATCATG | <i>mecD</i> operon                          | This study                                         |
| mec-XhoI-F  | -                        | TTATA <u>CTCGAG</u> CTGACTTCTCACTTAGTTTGAG       | <i>mecD</i> operon                          | This study                                         |
| mecD-SpeI-R | -                        | TTATA <u>ACTAGT</u> TTATTCTGAGTCTGGTTCATAAGTC    | <i>mecD</i> operon                          | This study                                         |
| truA-F      | c                        | GACAGTATCCCTGCAATCATTC                           | <i>truA</i>                                 | This study                                         |
| s66-R       | d                        | ACCAACCCGCATACTTCATC                             | <i>s66</i>                                  | This study                                         |
| int-0819-F  | e                        | TGGCTAAGGACAAAAGATCAG                            | <i>int</i> of McRI <sub><i>mecD</i>-1</sub> | This study                                         |
| int-0473-F  | f                        | TCATGGCTTCAGGCATACAC                             | <i>int</i> of McRI <sub><i>mecD</i>-2</sub> | This study                                         |
| araC-F      | g                        | TACCGTCATTCTGGCAAAC                              | <i>araC</i>                                 | This study                                         |
| orf21-R     | h                        | GCTCCATTGCCCATAGAC                               | <i>orf21</i>                                | This study                                         |
| orf20-F     | i                        | GTATTCCCAACTTCGTCTGGA                            | <i>orf20</i>                                | This study                                         |
| cop-R       | j                        | GCAAGAATTAATACAATCCAATCTG                        | <i>cop</i>                                  | This study                                         |

Restriction sites used for cloning are underlined.

Supplementary Table S2. PCR and restriction analysis for detection of McRI<sub>*mecD*-1</sub> and McRI<sub>*mecD*-2</sub> in *M. caseolyticus*.

| Template              | Forward primer (5' region) | Reverse primer (3' region) | Amplicon size/bp | Restriction enzyme | Sizes of restriction fragment/bp            |
|-----------------------|----------------------------|----------------------------|------------------|--------------------|---------------------------------------------|
| <i>mecD</i> -positive |                            |                            |                  |                    |                                             |
| IMD0819               | truA-F                     | mecD-R                     | 11,030           | HindIII            | 606 + 1,855 + 3,854 + 4,715                 |
|                       | mecD-F                     | s66-R                      | 19,771           | HincII             | 994 + 1,621 + 2,551 + 2,756 + 4,871 + 6,978 |
| KM0211                | truA-F                     | mecD-R                     | 11,030           | HindIII            | 606 + 1,855 + 3,854 + 4,715                 |
|                       | mecD-F                     | s66-R                      | 14,920           | HincII             | 994 + 1,621 + 2,127 + 2,551 + 2,756 + 4,871 |
| IMD0473               | truA-F                     | mecD-R                     | 10,846           | HindIII            | 52 + 781 + 1,579 + 1,855 + 2,120 + 4,459    |
|                       | mecD-F                     | s66-R                      | 8,114            | HincII             | 2,104 + 2,356 + 3,654                       |
| <i>mecD</i> -negative |                            |                            |                  |                    |                                             |
| KM1352                | truA-F                     | s66-R                      | 6,950            | EcoRI              | 607 + 1,346 + 1,584 + 3,413                 |

Supplementary Table S3. References for integrases used to construct phylogenetic tree of Figure 4.

| Strain                                  | Protein-ID     | GenBank/<br>Nucleotide position   | Reference                                                 |
|-----------------------------------------|----------------|-----------------------------------|-----------------------------------------------------------|
| <i>M. caseolyticus</i> IMD0819          |                | KY013611/<br>8427-7261            | This study                                                |
| <i>M. caseolyticus</i> KM0211           |                | KY013612/<br>8427-7261            | This study                                                |
| <i>M. caseolyticus</i> IMD0473          |                | KY013610/<br>8233-7076            | This study                                                |
| <i>M. caseolyticus</i> JCSC5402         | WP_012656138.1 | AP009484.1/<br>223907-222741      | J. Bacteriol. 2009; 191(4):1180-90.                       |
| <i>S. aureus</i> 930918-3               | WP_000161346.1 | ABFA01000015.1/<br>9951-11117     | BMC Genomics. 2008; 9:433.                                |
| <i>Lysinibacillus</i> sp. A1            | KHK50488.1     | JSZM01000021.1/<br>109128-107962  | Genome Announc. 2015; 3(2). pii: e00095-15.               |
| <i>B. chagannorensis</i> DSM 18086      | WP_026696990.1 | AUCK01000006.1/<br>56493-55324    | Int. J. Syst. Evol. Microbiol. 2007; 57(Pt 9):2084-8.     |
| <i>B. hemicellulosilyticus</i> JCM 9152 | GAE31526.1     | BAZO01000020.1/<br>59332-58589    | Genome Announc. 2014; 2(1):e01258-13.                     |
| <i>S. intermedius</i> NCTC 11048        | WP_019168674.1 | CAIB01000160.1/<br>37188-36052    | Front. Cell. Infect. Microbiol. 2012; 2:44.               |
| <i>S. hominis</i> LRKNS031              | OAW30112.1     | LXRS01000041.1/<br>43073-41937    | Direct Submission: Maurer, Baesler and Knobloch, 2016.    |
| <i>S. aureus</i> V329                   | AAP55251.1     | AY220730.1/<br>25643-26779        | Mol. Microbiol. 2003; 49(1):193-210.                      |
| <i>S. aureus</i> RF122                  | WP_000179355.1 | NC_007622.1/<br>2037180-2038352   | PLoS One. 2007; 2(10):e1120.                              |
| <i>S. pseudintermedius</i> 081661       | WP_037541925.1 | CP016073.1/<br>2667235-2668371    | Direct Submission: Riley, Bemis and Kania, 2016.          |
| <i>S. aureus</i> CS6-EEFIC (SaRIfusB)   | CAL23817.1     | AM292600.1/<br>2580-1405          | J. Clin. Microbiol. 2007; 45(5):1505-10. Epub 2007 Mar 7. |
| <i>S. aureus</i> Mu50 (SaPlm1)          | WP_000179343.1 | NC_002758.2/<br>2147530-2148702   | Lancet. 2001; 357(9264):1225-40.                          |
| <i>S. aureus</i> Mu50 (Tn5801)          | BAB56554.1     | NC_002758.2/<br>437264-436071     | Lancet. 2001; 357(9264):1225-40.                          |
| <i>S. aureus</i> Mu50 (SaPlm4)          | WP_000121223.1 | NC_002758.2/<br>869568-868462     | Lancet. 2001; 357(9264):1225-40.                          |
| <i>S. aureus</i> FORC_001               | WP_000179345.1 | NZ_CP009554.1/<br>2161377-2162549 | Microbiology. 2007; 153(Pt 10):3235-45.                   |
| <i>B. subtilis</i> 168                  | NP_388361.1    | NC_000964.3/<br>530611-529505     | Proc. Natl. Acad. Sci. U. S. A. 2004; 101(26):9786-91.    |
| <i>S. aureus</i> MRSA252                | WP_000270135.1 | NC_002952.2/<br>411390-410176     | Microbiol. Immunol. 2013; 57(2):91-9.                     |
| <i>S. aureus</i> IMV10                  | BAM66883.1     | AB716349.1/<br>2727-1510          | Direct Submission: Muzny et al., 2010                     |
| <i>S. aureus</i> TCH60                  | ADQ77825.1     | CP002110.1/<br>2475780-2477024    | Mol. Microbiol. 1998; 29(2):527-43.                       |
| <i>S. aureus</i> RN4282                 | AAC28969.1     | U93688.2/<br>13875-15095          | J. Biol. Chem. 2002; 277(15):13138-47.                    |
| <i>S. aureus</i> COL                    | AAL04148.1     | AF410775.1/<br>14574-15794        | Lancet. 2002; 359(9320):1819-27.                          |
| <i>S. aureus</i> MW2                    | WP_025174195.1 | NC_003923.1/<br>840811-839705     | Antimicrob. Agents Chemother. 2013; 57(11):5737-9.        |
| <i>S. epidermidis</i> NTUH-857          | BAO09125.1"    | AB828060.1/<br>2254-3911          | Plasmid. 1994; 32(3):350-4.                               |
| <i>E. faecalis</i> (Tn916)              | AAB60030.1     | U09422/<br>16641-17858            |                                                           |

Supplementary Table S4. Excision of circular DNA intermediates from *M. caseolyticus* chromosome.

| Template                           | PCR product                                                        | PCR primers           | Elongation time | Amplicon size/bp | Recombination sites | DR present in amplicon |
|------------------------------------|--------------------------------------------------------------------|-----------------------|-----------------|------------------|---------------------|------------------------|
| Circular intermediate              |                                                                    |                       |                 |                  |                     |                        |
| IMD0819                            | McRI <sub>mecD-1</sub>                                             | int-0819-F and mecD-F | 15 min          | 9,970            | DR1 and DR2         | DR1                    |
| IMD0819                            | McRI <sub>mecD-1</sub> -McCI <sub>IMD0819</sub>                    | int-0819-F and mecD-F | 15 min          | 12,563           | DR1 and DR3         | DR1                    |
| IMD0819                            | McCI <sub>IMD0819</sub>                                            | orf21-R and araC-F    | 1 min           | 763              | DR2 and DR3         | DR2                    |
| KM0211                             | McRI <sub>mecD-1</sub>                                             | int-0819-F and mecD-F | 15 min          | 9,970            | DR1 and DR2         | DR1                    |
| IMD0473                            | none                                                               | int-0473-F and mecD-F | 7 min           | -                | -                   | -                      |
| Chromosomal segment after excision |                                                                    |                       |                 |                  |                     |                        |
| IMD0819                            | $\Delta$ McRI <sub>mecD-1</sub>                                    | truA-F and cop-R      | 7 min           | 7,075            | DR1 and DR2         | DR2                    |
| IMD0819                            | $\Delta$ McRI <sub>mecD-1</sub> - $\Delta$ McCI <sub>IMD0819</sub> | truA-F and cop-R      | 7 min           | 4,301            | DR1 and DR3         | DR3                    |
| IMD0819                            | $\Delta$ McCI <sub>IMD0819</sub>                                   | orf20-F and cop-R     | 2 min           | 4,158            | DR2 and DR3         | DR3                    |
| KM0211                             | $\Delta$ McRI <sub>mecD-1</sub>                                    | truA-F and cop-R      | 1.5 min         | 2,224            | DR1 and DR2         | DR2                    |
